# Supplementary material for: Alkyl chlorido hydridotris(3,5-dimethylpyrazolyl)borate imido niobium and tantalum(v) complexes: synthesis, conformational states of alkyl groups in solid and solution, X-ray diffraction and multinuclear magnetic resonance spectroscopy studies
Source: Royal Society of Chemistry journal article supplement (doi:10.1039/c3dt53353k), 2014-01-01

## Electronic Supplementary Information.

ESI-1. Dbppste\_cc spectrum of the complex **3a** in C<sub>6</sub>D<sub>6</sub> at 25°C.

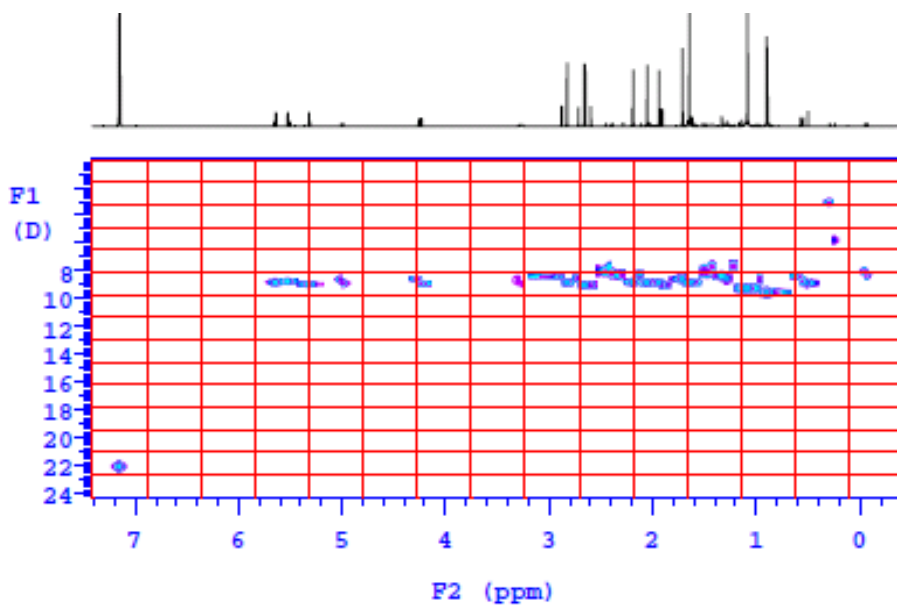

ESI-2. ROESYAD (mixR=500 ms) of **3a** in C<sub>6</sub>D<sub>6</sub> at 25°C.

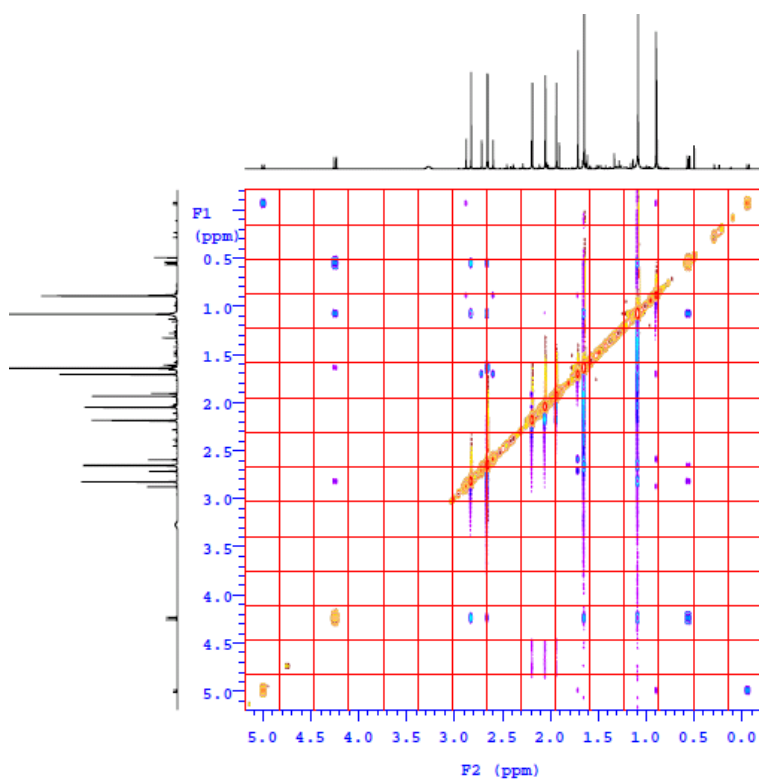

Supplement: c3dt53353k.pdf [file c3dt53353k.pdf]
